# Supplementary material for: Chemical transformation of Te into new ternary phase PbmCunTem+n nanorods and their surface atom diffusion and optical properties
Source: Royal Society of Chemistry journal article supplement (doi:10.1039/c6ra07779j), 2016-01-01
Supplement: c6ra07779j1.pdf [file c6ra07779j1.pdf]

## Supporting Information

### **Chemical transformation of Te into new ternary phase $\text{Pb}_m\text{Cu}_n\text{Te}_{m+n}$ nanorods and their surface atom diffusion and optical properties**

Qun Wang, <sup>\*ab</sup> Ziming Su, <sup>b</sup> Mingda Lv, <sup>a</sup> Jianhuan Li, <sup>b</sup> Baoyu Sun, <sup>b</sup> Guangjun Zhang<sup>\*a</sup>

<sup>a</sup>State Key Laboratory of Advanced Welding and Joining, <sup>b</sup>School of Chemistry and Chemical

Engineering, Harbin Institute of Technology, Harbin, 150001, China.

E-mail: wangqun5992@hit.edu.cn;

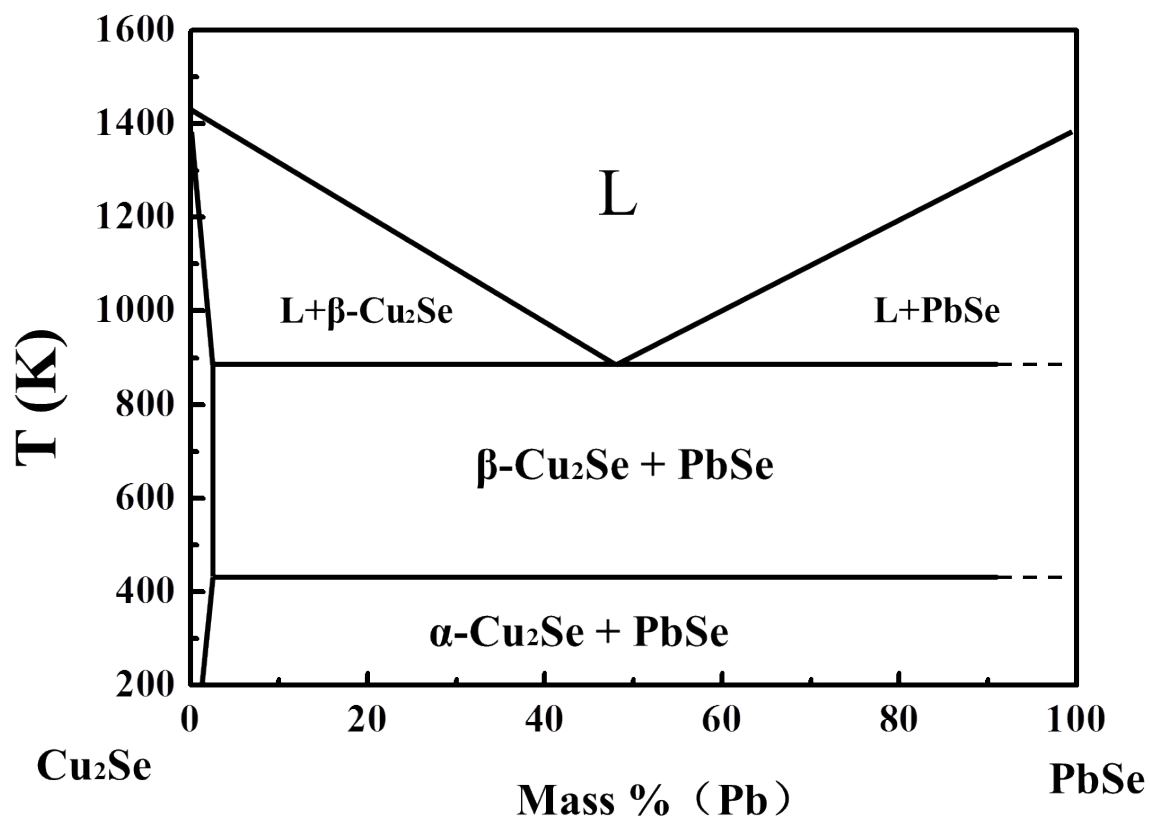

Fig. S1 Schematic representation of the phase diagram of the PbSe-Cu<sub>2</sub>Se system.<sup>1</sup>

**Reference:**

- (1) O. V. Marchuk, L. D. Gulay, V. Y. Shemet and I. D. Olekseyuk, *J. Alloys Comp.*, 2006, **416**, 106.
